1 **Haemocytes are critical for *Drosophila melanogaster* post-embryonic development,**  
2 **independent of control of the microbiota**

3 **HN Stephenson<sup>1\*</sup>, R Streeck<sup>1\*</sup>, A Herzig<sup>1,2</sup>**

4 <sup>1</sup>Department of Cellular Microbiology, Max Planck Institute for Infection Biology,  
5 Charitéplatz 1, Berlin 10117

6 <sup>2</sup>Author for correspondence (herzig@mpiib-berlin.mpg.de)

7 \*These authors contributed equally

8 **Running Title:** Haemocytes in pupal development

## 9 **Summary Statement**

10 Haemocyte-ablation in *Drosophila melanogaster* with a strong haemocyte-specific driver  
11 causes pupal lethality

12

## 13 **Abstract**

14 Proven roles for haemocytes (blood cells) have expanded beyond the control of infections  
15 in *Drosophila*. Despite this, the critical role of haemocytes in post-embryonic  
16 development has long been thought to be limited to control of microorganisms during  
17 metamorphosis. This has previously been shown by rescue of adult development in  
18 haemocyte-ablation models under germ-free conditions. Here we show that haemocytes have  
19 a critical role in post-embryonic development beyond their ability to control the microbiota.  
20 Using a newly generated, strong haemocyte-specific driver line for the GAL4/UAS system,  
21 we show that specific ablation of haemocytes is pupal lethal, even under axenic conditions.  
22 Genetic rescue experiments prove that this is a haemocyte-specific phenomena. RNA-seq  
23 data suggests that dysregulation of the midgut is a critical consequence of haemocyte  
24 ablation. We believe this novel role of haemocytes during metamorphosis is a major finding  
25 for the field. This is an exciting new *Drosophila* model to study the precise mechanisms in  
26 which haemocytes regulate tissue development, findings from which could have far reaching  
27 implications beyond invertebrate biology.

28

## 29 Introduction

30

31 *Drosophila melanogaster* is an important model to study both the immune and non-immune  
32 related functions of blood cells. There are 3 main blood cell types (haemocyte) in the fly  
33 (Mase, Augsburger et al. 2021). Plasmatocytes are macrophage-like cells, making up ~95%  
34 of larval blood cell counts. In addition to apoptotic cell and microorganism phagocytosis,  
35 they secrete signalling peptides, anti-microbial peptides, and extra-cellular matrix (ECM)  
36 proteins (Braun, Hoffmann et al. 1998, Olofsson and Page 2005). Crystal cells account for  
37 ~5% of larval blood cells. They express high levels of prophenoloxidases, which catalyse the  
38 extracellular production of melanin and toxic by-products upon cell lysis; critical for wound  
39 closure and immunity to a variety of pathogens (Binggeli, Neyen et al. 2014). Lamellocytes,  
40 rarely found in healthy larvae, transdifferentiate in large numbers from plasmatocytes to  
41 encapsulate large pathogens, such as wasp eggs (Sinenko, Shim et al. 2011). Recent single-  
42 cell RNA sequencing studies have shown greater heterogeneity in these cell types (Cattenoz,  
43 Sakr et al. 2020, Tattikota, Cho et al. 2020). There are ~10 different sub-types of  
44 plasmatocytes that are differentiated by distinct processes, for example phagocytosis versus  
45 AMP production.

46

47 Two waves of haematopoiesis occur in *Drosophila* development. Embryonic haemocytes  
48 originate from the head mesoderm; they are long-lived, many surviving until the adult stage  
49 (Tepass, Fessler et al. 1994). Larval haematopoiesis occurs in the lymph gland and in  
50 haematopoietic pockets, sessile patches of haemocytes associated with the larval cuticle.  
51 Haematopoietic pockets are the main source of increasing numbers of circulating haemocytes  
52 during larval development (Leitao and Sucena 2015); whereas haemocytes from the lymph  
53 gland are released into circulation at early metamorphosis (Jung, Evans et al. 2005)

54

55 Genetic ablation studies that aimed to identify the importance of blood cells for immune and  
56 non-immune related functions in *Drosophila* were first performed over a decade ago  
57 (Charroux and Royet 2009, Defaye, Evans et al. 2009, Shia, Glittenberg et al. 2009, Nehme,  
58 Quintin et al. 2011, Arefin, Kucerova et al. 2015). Haemocyte-specific expression of pro-  
59 apoptotic transgenes ablated cells through programmed cell death, achieving 60-75%  
60 reduction in larval haemocyte numbers. These studies primarily utilised promoters of the  
61 *Hemolectin* (*Hml*) gene, which shows haemocyte-specific expression in both larvae and  
62 adults (Sinenko and Mathey-Prevot 2004). Multiple studies showed a reduction in eclosion of

63 adult flies of up to 60%; interestingly however, eclosion rates were rescued when larvae were  
64 reared with antibiotics or under germ-free conditions (Charroux and Royet 2009, Defaye,  
65 Evans et al. 2009, Shia, Glittenberg et al. 2009, Arefin, Kucerova et al. 2015). This suggested  
66 control of microorganisms by haemocytes is critical during metamorphosis, and that  
67 haemocyte functions beyond immunity are non-essential for post-embryonic development  
68 (Charroux and Royet 2009, Defaye, Evans et al. 2009, Shia, Glittenberg et al. 2009, Arefin,  
69 Kucerova et al. 2015). In contrast, ablation of embryonic haemocytes is embryonic lethal  
70 independent of control of microorganisms (Defaye, Evans et al. 2009, Shia, Glittenberg et al.  
71 2009).

72

73 ‘Haemoless’ (haemocyte-ablated) larvae and adults are more susceptible to a number of  
74 bacterial and fungal infections (Charroux and Royet 2009, Defaye, Evans et al. 2009, Shia,  
75 Glittenberg et al. 2009); however the strength of phenotype is lower than for mutations of the  
76 humoral immune system (Charroux and Royet 2009). Phagocytosis is important for the  
77 immune function of haemocytes to various pathogens, demonstrated by knock-down of  
78 phagocytic receptors, and blocking phagocytosis by injecting beads (Charroux and Royet  
79 2009, Nehme, Quintin et al. 2011). The importance of haemocytes for the production of  
80 AMPs from the fat body is potentially stage-dependent; larvae seem dependent on  
81 haemocytes for robust AMP induction, unlike adult flies (Charroux and Royet 2009, Defaye,  
82 Evans et al. 2009, Shia, Glittenberg et al. 2009).

83

84 Studies of haemocyte functions beyond immunity show roles in phagocytosis of apoptotic  
85 cells, ECM deposition, metabolic regulation, and stem cell proliferation (Olofsson and Page  
86 2005, Martinek, Shahab et al. 2008, Ayyaz, Li et al. 2015, Woodcock, Kierdorf et al. 2015,  
87 Shin, Cha et al. 2020). Condensation of the ventral nerve cord during embryogenesis is  
88 dependent on haemocyte migration and subsequent deposition of ECM proteins (Martinek,  
89 Shahab et al. 2008). Defects in ECM production in haemocyte-ablated embryos may  
90 contribute to embryonic lethality.

91

92 In this study, we utilised ChIP-seq data of the *Hml* gene to design an improved *Drosophila*  
93 haemocyte-specific larval and adult driver line, *Hml<sup>e9-P2A</sup>-GAL4*. Using *Hml<sup>e9-P2A</sup>-GAL4* to  
94 drive apoptosis, we completely ablated haemocytes in the larvae. We show for the first time  
95 that haemocytes are essential for the development of adult stage flies, independent of control  
96 of the microbiota. RNA-seq data shows a striking upregulation of chitin ECM genes in the

97 midgut of 'haemoless' larvae, and points to a critical role of haemocytes in regulating  
98 intestinal development.

## 99 Results & Discussion

100

### 101 *Hml*<sup>e9-P2A</sup>-GAL4 is a strong haemocyte-specific driver

102 Studies in the fly have utilised a number of different enhancer elements to achieve  
103 haemocyte-specific expression of transgenes, deriving from the *Hemese* (*He*), *eater* and  
104 *Hemolectin* (*Hml*) genes in larvae and adults and from *Peroxidasin* (*Pxn*) and *serpent* (*srp*) in  
105 embryos (Charroux and Royet 2009, Defaye, Evans et al. 2009, Shia, Glittenberg et al. 2009,  
106 Arefin, Kucerova et al. 2015, Csordas, Grawe et al. 2020). The most widely used haemocyte-  
107 specific driver in larvae and adults is derived from the *Hml* promoter. The first *Hml*-GAL4  
108 driver, utilising 3kb upstream sequence of the *Hml* gene, was found to also include a second  
109 gene, *tsp68C* (Goto, Kumagai et al. 2001). Subsequently, a shorter 840bp region of the *Hml*  
110 enhancer lacking the *tsp68C* gene, *Hml*<sup>Δ</sup>, was found to be sufficient for haemocyte-specific  
111 expression of GAL4, and is widely used to date (Sinenko and Mathey-Prevot 2004).

112

113 To generate a stronger haemocyte-specific driver line, we optimised the *Hml* enhancer  
114 element (Fig. 1A). ChIP-seq analysis of the *Hml* gene from plasmatocytes revealed that  
115 histone H3 lysine 4 monomethylation (H3K4me1), which is typically found in enhancer  
116 regions (Calo and Wysocka 2013), extended into the *Hml* coding sequence up to exon 9  
117 (Streeck *et al.* manuscript in preparation) . We therefore included the first 9 exons of *Hml*  
118 followed by a P2A self-cleaving sequence upstream of GAL4 (*Hml*<sup>e9-P2A</sup>-GAL4). Transgenic  
119 flies were generated at two landing-sites, attP40 (chromosome II) and attP2 (chromosome  
120 III). To compare the expression strength of *Hml*<sup>e9-P2A</sup>-GAL4 with *Hml*<sup>Δ</sup>-GAL4 we used a  
121 *UAS-2xEGFP* reporter line (*Hml*<sup>e9-P2A</sup>>GFP and *Hml*<sup>Δ</sup>>GFP), and assayed GFP expression  
122 from isolated 3<sup>rd</sup> instar larvae haemocytes by flow cytometry (Fig. 1B). *Hml*<sup>e9-P2A</sup>>GFP  
123 haemocytes showed ~4-fold higher GFP expression than *Hml*<sup>Δ</sup>>GFP haemocytes, irrespective  
124 of the *Hml*<sup>e9-P2A</sup>-GAL4 landing site. This difference in expression strength was clearly  
125 observable by whole mount microscopy of 3<sup>rd</sup> instar larvae and adults (Fig. 1C and Fig. S1A,  
126 B).

127

128 Haemocyte-ablation experiments have previously been performed with *Hml*<sup>Δ</sup>-GAL4 driven  
129 expression of various pro-apoptotic genes, resulting in a significant reduction of plasmatocyte  
130 and crystal cell numbers (Charroux and Royet 2009, Defaye, Evans et al. 2009, Shia,  
131 Glittenberg et al. 2009, Arefin, Kucerova et al. 2015). Based on GFP reporter expression, we  
132 asked whether *Hml*<sup>e9-P2A</sup>-GAL4 might allow for complete ablation of haemocytes. Therefore,

133 we expressed the *Drosophila* pro-apoptotic gene *reaper* (*rpr*) or the mouse BCL2-associated  
134 X protein gene (*Bax*) with *Hml<sup>Δ</sup>-GAL4* or *Hml<sup>e9-P2A</sup>-GAL4* and compared them to a control  
135 without GAL4 induction (*attP2>rpr*; *attP2>Bax*). In 3<sup>rd</sup> instar *Hml<sup>e9-P2A</sup>>rpr* or *Hml<sup>e9-</sup>*  
136 *P2A>Bax* larvae, we found less than 1% of plasmatocytes (Fig. 1E) and crystal cells (Fig. 1F  
137 and Fig. S1C) remaining. In comparison, driving expression with the original *Hml<sup>Δ</sup>-GAL4*  
138 line resulted in reduced but detectable numbers of both blood cell type, similar to previous  
139 reports (Charroux and Royet 2009, Defaye, Evans et al. 2009, Shia, Glittenberg et al. 2009).  
140 We observed no increase in lamellocyte numbers when ablating with the *Hml<sup>e9-P2A</sup>* driver, as  
141 determined by size and shape on a haemocytometer (n>30 3<sup>rd</sup> instar larvae), in contrast to  
142 previous observations when ablation was performed with the *Hml<sup>Δ</sup>* driver (Arefin, Kucerova  
143 et al. 2015). Two previous studies have observed increases in melanotic masses in  
144 ‘haemless’ flies (Defaye, Evans et al. 2009, Arefin, Kucerova et al. 2015), although others  
145 not (Charroux and Royet 2009, Shia, Glittenberg et al. 2009). We observed no melanotic  
146 masses in *Hml<sup>e9-P2A</sup>>rpr* or *Hml<sup>P2A</sup>>Bax* larvae as determined by whole mount microscopy of  
147 3<sup>rd</sup> instar larvae (n>20).

148

#### 149 **Haemocyte ablation with *Hml<sup>e9-P2A</sup>-Gal4* is pupal lethal under germ-free conditions**

150 Previous ablation studies using *Hml<sup>Δ</sup>-GAL4* have shown a reduction in eclosion rates that  
151 were rescued when larvae were reared with antibiotics or under germ-free conditions  
152 (Charroux and Royet 2009, Defaye, Evans et al. 2009, Shia, Glittenberg et al. 2009, Arefin,  
153 Kucerova et al. 2015). This suggested a critical role for haemocytes in controlling  
154 microorganisms during metamorphosis. Given the improved ablation rate of haemocytes  
155 using *Hml<sup>e9-P2A</sup>-GAL4* we revisited this observation. Both, *Hml<sup>e9-P2A</sup>>rpr* and *Hml<sup>Δ</sup>>rpr*  
156 larvae showed no decrease in pupariation rates compared to control larvae when reared at  
157 controlled density from 1<sup>st</sup> larval instar (Fig. 2A). This is consistent with previous reports and  
158 suggested that larval development was not significantly affected by haemocyte ablation. We  
159 observed no gross delay in timing to pupariation between any of the genotypes. Eclosion  
160 rates of *Hml<sup>Δ</sup>>rpr* and *Hml<sup>Δ</sup>>Bax* pupae were reduced by approximately 25%, which was  
161 lower than previously reported (Charroux and Royet 2009, Defaye, Evans et al. 2009, Shia,  
162 Glittenberg et al. 2009, Arefin, Kucerova et al. 2015), but still statistically significant (Fig.  
163 2B). Strikingly, the rates of eclosion for *Hml<sup>e9-P2A</sup>>rpr* and *Hml<sup>e9-P2A</sup>>Bax* pupae dropped to  
164 0% (Fig. 2B). We then reared 1<sup>st</sup> instar larvae either on food containing antibiotics (5mg/mL  
165 Ampicillin, 5mg/mL Kanamycin) or under germ-free conditions. Eclosion rates of *Hml<sup>Δ</sup>>rpr*  
166 and *Hml<sup>Δ</sup>>Bax* pupae were restored to expected levels (Fig. 2C, D). In contrast, even with

167 antibiotics or under germ-free conditions  $Hml^{e9-P2A}>rpr$  and  $Hml^{e9-P2A}>Bax$  pupae did not  
168 eclose (Fig. 2C, D). This pointed to an essential role for haemocytes during pupal  
169 development, independent of control of the microbiota during metamorphosis.

170

### 171 **Eclosion rates are rescued with haemocyte-specific expression of GAL80**

172 In order to minimise the chance that pupal lethality in our ablation experiments was caused  
173 by off-target expression of  $Hml^{e9-P2A}$ -GAL4, we performed genetic rescue experiments with  
174 haemocyte-specific expression of the GAL4 inhibitor, GAL80, using well established  
175 haemocyte-specific driver constructs. Since we anticipated that these experiments would be  
176 critically dependent on GAL80 expression levels we used multiple approaches. First, we used  
177 GAL80 directly regulated by a haemocyte-specific enhancer of the *serpent* (*srp*) gene  
178 (*srpHemo*-GAL80), which is known to be expressed in haemocytes (Gyoergy, Roblek et al.  
179 2018). Eclosion rates of  $Hml^{e9-P2A}>rpr$ , *srpHemo*-GAL80 pupae were restored to levels seen  
180 for the control with both  $Hml^{e9-P2A}$ -GAL4 lines, integrated either in attP40 or attP2 (Fig. 2E).  
181 Alternatively, we expressed GAL80 utilising the QF-QUAS system (Potter, Tasic et al.  
182 2010). To achieve haemocyte-specific expression of a QUAS-GAL80 transgene we used  
183 *srpHemo*-QF2 (*srpHemo*>GAL80) or  $Hml^A$ -QF2 ( $Hml^A$ >GAL80). In both cases eclosion  
184 rates of  $Hml^{e9-P2A}>rpr$  pupae were restored to expected levels (Fig. 2E). Pupariation was not  
185 significantly affected in any of these conditions, and the suppression of  $Hml^{e9-P2A}>GFP$  by  
186 *srpHemo*>GAL80 and to a lesser extent by  $Hml^A$ >GAL80 was observable in whole mount  
187 microscopy of larvae and adult flies (Fig. S2A, B). Overall, this showed that pupal lethality  
188 was specifically driven by *rpr* and *Bax* expression in haemocytes, and is unlikely to result  
189 from an off-target effect.

190

### 191 **Haemocyte ablation leads to dysregulation of midgut expressed genes**

192 We reasoned that effects from haemocyte ablation would potentially be detectable by  
193 transcriptional changes and therefore compared  $Hml^{e9-P2A}>rpr$  and *attP2*>*rpr* larvae,  
194 immediately before the onset of their lethal phase by RNAseq. In this experiment  
195 downregulated transcripts would comprise both, lost haemocyte-specific transcripts and  
196 potential systemic responses; therefore, we followed two strategies to disentangle these  
197 effects. First, we compared larval RNAseq data to a plasmatocyte-specific dataset that we  
198 recently generated (Streeck *et al.* manuscript in preparation) and defined transcripts as non-  
199 plasmatocyte, shared or plasmatocyte-enriched (Fig. 3A). Second, we analysed tissue-specific  
200 enrichment of transcripts based on data available at FlyAtlas2 (Leader, Krause et al. 2018)



201 (Fig. S3A). Known haemocyte-specific transcripts, such as *Hml*, *He*, *eater*, *Pxn* and *NimCI*,  
202 were detected as plasmatocyte-enriched (Fig. 3A) and were predominantly expressed in the  
203 larval carcass (Fig. S3B), likely reflecting the association of sessile haemocytes with the  
204 cuticle or lymph glands in the carcass. These transcripts were also significantly depleted in  
205 the differential expression analysis of *Hml<sup>e9-P2A</sup>>rpr* and *attP2>rpr* larvae (Fig. 3B, Fig. S3C  
206 and Table S1).

207

208 Gene ontology (GO) analysis of depleted transcripts in ‘haemoless’ larvae revealed  
209 phagocytosis as the only significantly enriched process or function (Fig. 3C). This was likely  
210 driven by depletion of haemocyte transcripts and was maintained when plasmatocyte-  
211 enriched transcripts were analysed alone (Fig. 3C). The entire group of depleted transcripts  
212 comprised an increased fraction of fat body- (31%) and carcass-enriched (18%) transcripts  
213 relative to the control group of all genes (17% and 6% respectively) (Fig. 3D and Fig. S3A).  
214 However, only a minority of fat body- (8/34) and carcass-enriched (4/19) transcripts were  
215 non-plasmatocyte, therefore we cannot conclude that this was a tissue-specific effect of  
216 haemocyte ablation. In summary, we did not detect a clear systemic response based on  
217 downregulation of tissue-specific transcription in ‘haemoless’ larvae.

218

219 In contrast, we found upregulated transcripts primarily comprised non-plasmatocyte  
220 transcripts (131/170), indicating a systemic response to haemocyte ablation (Fig. 3B). A  
221 previous report showed that haemocyte ablation triggers a pro-inflammatory basal state  
222 (Arefin, Kucerova et al. 2015). Consistent with this, we found enrichment of immune-related  
223 GO terms within upregulated fat body expressed transcripts (Fig. 3C). The majority of  
224 upregulated genes, however, were expressed in the midgut (Fig. 3E and Fig S3E). GO  
225 analysis showed a strong enrichment of genes associated with chitin metabolism in  
226 specifically midgut-enriched genes (Fig. 3C). No other significant GO term enrichment was  
227 found for the entire set of upregulated genes. Genes regulated in the midgut included factors  
228 with chitin binding activity like *obstructor-I (obst-I)*, *Mucin 55B (Muc55B)*, and proteins  
229 with hydrolase activity such as the chitinases, *Cht4* and *Cht9* (Fig. 3C, E). These genes are  
230 critical for chitin-associated ECM production and remodelling (Pesch, Riedel et al. 2016).  
231 We speculate that the loss of haemocyte function may causes a compensatory increase in  
232 chitin-based ECM production, potentially to increase barrier function at the peritrophic  
233 membrane. Interestingly, haemocytes are found within the basal lamina of the midgut and are  
234 critical for intestinal stem cell (ISC) proliferation in response to infection (Ayyaz, Li et al.

235 2015). Haemocyte ablation may therefore also affect ISC maintenance, causing direct  
236 developmental defects in the gut. It would be interesting to address whether dysregulation of  
237 the midgut is a direct consequence of ablated haemocyte functions, since a reduction in  
238 midgut barrier function could explain why lethal phenotypes in partial ablation experiments  
239 were rescued under germ-free conditions, and at the same time why we found a  
240 developmental requirement of haemocytes in our complete ablation model.

241

242 Taken together, we have shown an essential role for haemocytes in post-embryonic  
243 development beyond the control of microorganisms. This new model could provide exciting  
244 insights into the requirement of haemocytes in tissue development, beyond their essential role  
245 in the immune system.

## 246 **Materials & Methods**

247

### 248 ***Drosophila melanogaster* Strains**

249 Fly strains obtained from Bloomington Stock Centre were *Hml<sup>Δ</sup>-GAL4* (30139), *UAS-*  
250 *2xEGFP* (6874), *UAS-rpr* II (5824), *UAS-rpr* X (5823), *srpHemo-QF2* (78365), *srpHemo-*  
251 *GAL80* (78366), *Hml<sup>Δ</sup>-QF2* (66468), *QUAS-GAL80* (51590) and *attP2* (8622). The *P{UAS-*  
252 *Bax.G}* integration on chromosome II (*UAS-Bax*) was a gift from Carla Saleh (Department of  
253 Virology, Institute Pasteur) and balanced with *CyO*, *P{ActGFP}JMRI*. The *Hml<sup>e9-P2A</sup>-GAL4*  
254 lines were constructed in this study.

255

### 256 **Generation of *Hml<sup>e9-P2A</sup>-GAL4* Flies**

257 A 3477bp fragment was synthesised (Eurofins) containing 840bp upstream of the *Hml*  
258 transcription start site and the *Hml* transcript up to the end of exon 9 (bp13845367 –  
259 bp13848766, dm6), directly followed by an *AvrII* site, a P2A translation skip sequence, and a  
260 *XbaI* site. The *XbaI* site was used to insert the GAL4 coding sequence from pGawB  
261 followed by a SV40 3'UTR from pUAS. The construct was assembled in a backbone  
262 derived from pDESTR3R4- $\phi$ C31*attB* (Gunesdogan, Jackle et al. 2010), containing a *w<sup>+mc</sup>*  
263 transformation marker and *attB* integration sequence. Transgenic lines were generated in  
264 *P{CaryP}attP40* and *P{CaryP}attP2* by Rainbow Transgenics. Inc (Camarillo, USA). The  
265 resulting *P{Hml-GAL4.e9-P2A}attP40* and *P{Hml-GAL4.e9-P2A}attP2* integrations were  
266 crossed out to remove integrase transgenes before further use.

267

### 268 **Haemocyte Ablation**

269 *Hml<sup>Δ</sup>-GAL4*, *Hml<sup>e9-P2A</sup>-GAL4* in *attP2* or control *P{CaryP}attP2* males were crossed to  
270 either *UAS-rpr* or *UAS-Bax* virgin females. For the homozygous lethal *UAS-Bax* integration  
271 we used the absence of *CyO*, *P{ActGFP}JMRI* balancer chromosome to identify and score  
272 *Bax* expressing animals. Crosses were put in collection cages containing apple juice agar  
273 plates at 25°C in a 12h light/dark cycling incubator. 1<sup>st</sup> instar larvae were picked from apple  
274 agar plates and placed at 100 larvae/15mL vial containing standard fly food. Larvae were  
275 reared at 25°C in a 12h light/dark cycling incubator until further experimentation.

276

### 277 **Pupariation/Eclosion Assays**

278 Pupae were counted and scored from haemocyte ablation experiments as fraction of expected.  
279 For experiments involving *UAS-rpr* the score was based on pupae/vial with 100 larvae per

280 vial. For experiments involving the homozygous lethal *UAS-Bax* integration, the score was  
281 based on the ratio between GFP positive (with balancer chromosome) and negative larvae.  
282 Similarly, eclosed adults were scored as fraction of expected adults/pupae per vial for crosses  
283 with *UAS-rpr* and by the ratio of *Cy<sup>-</sup>* (with balancer chromosome) versus *Cy<sup>-</sup>* flies for crosses  
284 with *UAS-Bax*. Vials were left 1 week longer to check for late eclosing adults. For animals  
285 reared with antibiotics, 5mg/mL Ampicillin + 5mg/mL Kanamycin was added to the standard  
286 fly food.

287

### 288 **Germ-free Flies**

289 Crosses were set-up in collections with apple agar plates for 6hr at 25°C. Embryos were  
290 collected with PBS + 0.01% Triton-X (PBS-T) and transferred to a 100 µm cell strainer.  
291 Embryos were washed in twice in PBS-T, then placed in 70% ethanol for 5 mins. Embryos  
292 were dechorionated in 50:50 Clorax:Water (2.5% HOCl , final concentration), for 2 mins.  
293 Embryos were further washed in sterile PBS-T and pipetted into sterile standard fly food.  
294 Animals were reared at 25°C in a 12 h light/dark cycling incubator. To test for the absence of  
295 microbiota, single hatched animals were collected and crushed under sterile conditions with a  
296 pestle in 200 µL PBS. The solution was spread on YPD plates and grown at 25°C for 24 h or  
297 longer and checked for sterility.

298

### 299 **Genetic Rescue Experiments**

300 Crosses were set up for the 3 different rescue strategies leading to following genotypes:

301 1) *srpHemo-GAL80* rescue:

302  $+ / UAS-rpr ; P\{Hml-GAL4.e9-P2A\}attP2 / srpHemo-GAL80$

303 2) *srpHemo-QF2* rescue:

304  $P\{Hml-GAL4.e9-P2A\}attP40 / UAS-rpr ; srpHemo-QF2 / QUAS-GAL80$

305 3) *Hml<sup>A</sup>-QF2* rescue:

306  $Hml^A-QF2 / UAS-rpr ; P\{Hml-GAL4.e9-P2A\}attP2 / QUAS-GAL80$

307 Larvae were picked and survival was scored as described above.

308

### 309 **Haemocyte Extraction**

310 3<sup>rd</sup> instar wandering stage larvae were collected and extensively washed under running water  
311 in 100 µm cell strainers to remove debris. Larvae were then washed in 70% ethanol for 5  
312 mins. Sessile haemocytes were dislodged by extensively rubbing the larvae with a paint

313 brush. Larval cuticles were ripped open from posterior to anterior using fine forceps and  
314 haemocytes bled out.

315

### 316 **Haemocyte Quantification**

317 Plasmatocytes from five 3<sup>rd</sup> instar larvae were bled into 20 $\mu$ L PBS + EDTA + protease  
318 inhibitor cocktail on parafilm and counted on a haemocytometer. For crystal cell  
319 quantification 3<sup>rd</sup> instar larvae were picked and washed in PBS and then heat-shocked at 65°C  
320 for 10 mins which causes the crystal cells to melanise and turn black. For each larvae a dorsal  
321 and ventral image was taken using a Leica M205 stereo microscope. Crystal cells were  
322 counted manually.

323

### 324 **Plasmatocyte Fluorescence-Activated Cell Sorting Analysis**

325 In total of 50 3<sup>rd</sup> instar larvae were bled into the lid of an 1.5 mL Eppendorf tube containing  
326 200  $\mu$ L Schneider's media w/o bicarbonate, pH 7.4 (Sigma) + 1/250 protease inhibitor  
327 cocktail (Sigma). Carcasses were removed and the cell solution was transferred to a 1.5 mL  
328 Eppendorf tube containing 800  $\mu$ L fresh media and then passed through at 70  $\mu$ m Flowmi tip  
329 filter (Sigma). Cells were analysed on a MACSQuant Analyser.

330

### 331 **Plasmatocyte RNAseq**

332 OreR larvae were raised at controlled density as described above. Plasmatocytes were  
333 extracted as described above into complete media in tissue-culture treated dishes (Schneider's  
334 medium with 10% FCS and 10 mM N-Acetyl-L-Cysteine). 80 larvae were bled for each  
335 sample. The larval carcasses were then removed and the plasmatocytes were allowed to  
336 attach for 10-15 minutes. Afterwards, plasmatocytes were washed 4 times with PBS and  
337 lysed in 900  $\mu$ L TRIzol. Samples were moved to fresh prespun phase lock heavy tubes. 250  
338  $\mu$ L chloroform was added to each sample, mixed thoroughly and centrifuged (12000 g, room  
339 temperature, 15 minutes). The upper aqueous phase was then moved to a fresh DNA LoBind  
340 tube, and mixed with 550  $\mu$ L isopropanol and 1  $\mu$ L glycogen (20 mg/mL, RNase free).  
341 Samples were mixed by inverting and incubated for 30 minutes in the freezer at -20°C.  
342 Samples were centrifuged (16000 g, 4°C, 10 minutes) and the supernatant was removed  
343 carefully without disrupting the pellet. The pellet was resuspended in 100  $\mu$ L ultra-pure water  
344 with 300 mM sodium acetate and 1  $\mu$ L glycogen (20 mg/mL, RNase free). 300  $\mu$ L EtOH  
345 was added and the sample was incubated for 20 minutes at -20°C, then centrifuged (16000 g,

346 4°C, 10 minutes) and the supernatant was discarded. The pellet was washed 2 times by  
347 adding 1 mL of 70% EtOH (prepared with ultra-pure water), each time spinning down the  
348 pellet (16000 g, 4°C, 3 minutes). Afterwards all supernatant was drained and the pellet was  
349 dried until no liquid was visible. The pellet was then resuspended in 15 µL of ultra-pure  
350 water and stored at -80°C. Libraries from samples were generated and sequenced at the Max  
351 Planck Genome Centre in Cologne.

352

### 353 **Larval RNAseq**

354 *Hml<sup>e9-P2A</sup>-GAL4* in *attP2* or control *P{CaryP}attP2* males were crossed to *UAS-rpr* X virgins  
355 and larvae were raised as described above. 10 male larvae were collected at 3<sup>rd</sup> instar  
356 wandering stage per sample across independent replicates and snap-frozen in liquid nitrogen.  
357 Larvae were transferred to Lysing Matrix E homogenization tubes with 1mL of TRIzol and  
358 ruptured on high settings in a FastPrep tissue homogenizer (MP Biomedicals). The  
359 supernatant was transferred to a fresh tube and spun down for 2 minutes at max speed. 800  
360 µL of the TRIzol sample was transferred to a fresh prespun phase lock heavy tube (5PRIME)  
361 and 200µl Chloroform was added. Phases were separated by spinning at 12000 g, 15 min,  
362 4°C. The upper aqueous phase was transferred to a fresh tube and mixed with 500 µL  
363 isopropanol. The resulting mix was spun at 20000 g, 15 min, 4°C. All supernatant was then  
364 drained and the pellet resuspended in 30 µL DNase solution (Ambicon, final conc. 0.2 U/µL)  
365 and incubated for 1 h at 37°C. RNA was purified using the RNeasy Plus kit (Qiagen) by  
366 adding 270 µL RTL buffer and then isolated according the manufacturer's instructions. RNA  
367 concentration was determined by Nanodrop and integrity was checked by Bioanalyzer.  
368 Libraries from samples were generated and sequenced at the Max Planck Genome Centre in  
369 Cologne.

370

### 371 **RNA data mapping and analysis**

372 All sequencing data was transferred from the Max Planck Genome Centre (Cologne).  
373 The reference genome fasta sequence file of the Berkeley Drosophila Genome Project  
374 assembly dm6 and the related gtf genome annotation file for dm6 of ensembl release 91  
375 (dm6.91) were downloaded from ensembl ([www.ensembl.org](http://www.ensembl.org)) (Zerbino, Achuthan et al.  
376 2018). A reference genome index was generated using dm6.91 using STAR-2.7.0e (Dobin,  
377 Davis et al. 2013) and used to map the fastq files. Quality control of RNA-seq mapping was  
378 performed using RSeQC (Zhang, Singh et al. 2021). All quality control files for FastQC,  
379 STAR mapping, and RSeQC were aggregated and visualized using MultiQC (Ewels,

380 Magnusson et al. 2016) and all data was checked to make sure the library and sequencing was  
381 of good quality. Once a data set passed quality control, the gene level read counts were  
382 determined from bam files using the subread package (Liao, Smyth et al. 2013). The gene  
383 level read counts were then loaded into R. For PCA analysis the matrix of gene level read  
384 counts was transformed using the DESeq2 (Love, Huber et al. 2014) rlog function, from  
385 which the 1000 most variant genes were selected, PCA analysis was performed using the  
386 stats package prcomp function. For differential expression analysis, gene level read counts  
387 were processed using the edgeR package (Robinson, McCarthy et al. 2010) with the quasi-  
388 likelihood general linear model approach according to the manual. GO Term enrichment was  
389 performed using GOrilla (<http://cbl-gorilla.cs.technion.ac.il/>) (Eden, Navon et al. 2009)  
390 testing enrichment of regulated protein coding gene sets against all genes detected in the  
391 experiment

392

### 393 **Tissue enrichment analysis**

394 All available data sets for protein coding genes detected in the RNAseq experiments were  
395 downloaded as text files from the web interface of FlyAtlas2  
396 (<http://flyatlas.gla.ac.uk/FlyAtlas2/index.html?page=home#>). From these files tissue  
397 enrichments of individual transcripts were extracted, leaving out the enrichment in Garland  
398 cells since no documentation was available on how these cells were purified. The enrichment  
399 values were scaled in R and the resulting z-scores visualized as heatmaps after k-means  
400 clustering.

401

### 402 **Data Availability**

403 RNA-seq data of hemocyte-ablated larvae and of primary plasmatocytes is available on  
404 ArrayExpress (E-MTAB-11095 and E-MTAB-10759 respectively).



405 **Figure Legends**

406

407 **Figure 1. *Hml<sup>e9-P2A</sup>-GAL4* is a strong haemocyte-specific driver**

408 (A) Schematic of H3K4me1 ChIP-seq data on the *Hml* gene and the *Hml<sup>e9-P2A</sup>-GAL4*  
409 construct.

410 (B) FACS analysis of *Hml<sup>e9-P2A</sup>>GFP* 3<sup>rd</sup> instar wandering stage larval haemocytes derived  
411 from integrations in attP40 and attP2 compared to *Hml<sup>Δ</sup>>GFP* or *attP2>GFP* (control).  
412 Representative histogram from two independent experiments.

413 (C) Whole-mount fluorescence microscopy of 3<sup>rd</sup> instar wandering stage larvae from *Hml<sup>e9-</sup>*  
414 *P2A>GFP*, *Hml<sup>Δ</sup>>GFP* or *attP2>GFP* (control).

415 (D, E) Plasmacyte counts by haemocytometer (D) and crystal cell counts by whole mount  
416 microscopy (E) from 3<sup>rd</sup> instar wandering stage larvae. Each dot represents average counts  
417 from 5 animals (E) or a single animal (F). One-way ANOVA analyses were performed.

418

419 **Figure 2. Haemocyte ablation with *Hml<sup>e9-P2A</sup>-GAL4* is pupal lethal under germ-free**  
420 **conditions**

421 (A) Pupariation was scored as percent of the expected number of pupae from larvae raised at  
422 controlled density (100/vial). Each dot represents an individual vial.

423 (B) Eclosion rates were scored based on the numbers of adults as fraction of the expected  
424 number of adults. Each dot represents an individual vial.

425 (C) Eclosion rates were scored as percent of expected adults from larvae raised at controlled  
426 density (100/vial) on standard fly food containing 5 mg/mL Ampicillin and 5 mg/mL  
427 Kanamycin.

428 (D) Eclosion rates were scored as percent of expected adults from larvae that hatched under  
429 germ-free conditions and were raised on sterile standard fly food.

430 (E) Genetic rescue experiments were performed suppressing the activity of *Hml<sup>e9-P2A</sup>* either by  
431 *srpHemo-GAL80* or through QUAS/QF mediated expression of GAL80 in *srpHemo>GAL80*  
432 and *Hml<sup>Δ</sup>> GAL80* animals. Eclosion rates were scored as percent of expected adults from  
433 larvae raised at controlled density (100/vial).

434 One-way ANOVA analyses were performed.

435

436 **Figure 3. RNAseq analysis of ‘haemoless’ 3<sup>rd</sup> instar wandering larvae.**

437 (A) RNAseq expression analysis comparing relative expression strength (in tags per million,  
438 tpm) of transcripts in whole larvae with expression in larval plasmacytes (both 3<sup>rd</sup> instar



439 wandering stage). Dots represent individual transcripts with overlaid density plot. Genes were  
440 classified as non-plasmatocyte (no or marginal expression in plasmatocytes, blue), shared  
441 (yellow) or plasmatocyte-enriched (>4 fold elevated in plasmatocytes, red). Haemocyte-  
442 specific transcripts are labeled.

443 (B) Volcano plot illustrating differential transcriptome analysis of *Hml<sup>e9-P2A</sup>>rpr* versus  
444 *attP2>rpr* 3<sup>rd</sup> instar wandering stage larvae. Dots mark log<sub>2</sub> fold changes and log<sub>10</sub>  
445 differential expression p-values for individual genes. Genes are colored by assignment as in  
446 (A) with non-significantly regulated transcripts in lighter colors. The 15 most significantly  
447 regulated transcripts and haemocyte-specific transcripts are labeled.

448 (C) Gene ontology enrichment analysis testing sets of regulated transcripts against all  
449 detected transcripts. Depleted transcripts were tested as whole set (all) or plasmatocyte-  
450 enriched subset. Upregulated transcripts were tested as whole set or as sets that show tissue  
451 specific expression (fat body, midgut). Fill color indicates p-value of enrichment and circle  
452 size shows effect size.

453 (D, E) Heatmaps showing scaled tissue enrichment derived from FlyAtlas2 for depleted (D)  
454 or upregulated (E) protein coding transcripts. The fraction of transcripts within each k-means  
455 cluster is indicated in percent, the tissue type below the heatmap. A list of midgut specific  
456 transcripts that were upregulated in response to haemocyte ablation is shown (E). Fill color  
457 indicates scaled enrichment values.

458

### 459 **Supplementary Figure 1.**

460 (A) Whole-mount fluorescence microscopy of *Hml<sup>e9-P2A</sup>>GFP* 3<sup>rd</sup> instar wandering stage  
461 larvae derived from the *Hml<sup>e9-P2A</sup>-GAL4* integration in attP40 compared to *Hml<sup>Δ</sup>>GFP* and  
462 *attP2>GFP*.

463 (B, C) Whole-mount fluorescence microscopy of adult stage *Hml<sup>e9-P2A</sup>>GFP* animals derived  
464 from the *Hml<sup>e9-P2A</sup>-GAL4* integrations in attP2 (B) or attP40 (C), compared to *Hml<sup>Δ</sup>>GFP*  
465 and *attP2>GFP*.

466 (C) Representative images of heat-shocked larvae used for crystal cell quantification

467

### 468 **Supplementary Figure 2.**

469 (A, B) Whole-mount fluorescence microscopy of 3<sup>rd</sup> instar larvae (A) and adult flies (B) from  
470 experiments using *srpHemo>GAL80* and *Hml<sup>Δ</sup>>GAL80* to suppress GFP expression in *Hml<sup>e9-</sup>*  
471 *P2A>GFP* animals. *srpHemo>GAL80* suppressed GFP expression to undetectable levels both  
472 in adults and larvae. *Hml<sup>Δ</sup>>GAL80* weakened GFP expression in larvae but haemocytes were

473 still visible. This is consistent with the idea that the *Hml<sup>e9-P2A</sup>* enhancer is stronger than the  
474 *Hml<sup>Δ</sup>* enhancer.

475 (C) Pupariation rates were determined in genetic rescue experiments using either *srpHemo*-  
476 GAL80 or QUAS/QF mediated expression of GAL80 in *srpHemo>GAL80* and *Hml<sup>Δ</sup>>*  
477 GAL80 animals to suppress the activity of *Hml<sup>e9-P2A</sup>*. Rates were scored as percent of expected  
478 pupae from larvae raised at controlled density (100/vial).

479

### 480 **Supplementary Figure 3.**

481 (A) Heatmap showing scaled tissue enrichment of all protein coding transcripts detected in  
482 our differential expression analysis for which data was available at FlyAtlas2.

483 (B) Heatmaps showing tissue enrichment for subsets of transcripts shown in (A). These  
484 subsets reflect the classification into plasmatocyte-enriched transcripts, shared transcripts and  
485 non-plasmatocyte transcripts. Haemocyte specific transcripts cluster together with carcass  
486 enriched transcripts as indicated.

487 (C) Principle component analysis (PCA) of RNAseq replicate data from *Hml<sup>P2A</sup>>rpr* or  
488 *attP2>rpr* 3<sup>rd</sup> instar wandering stage larvae.

489 (D, E) Heatmaps showing plasmatocyteenriched transcripts that were depleted (D), or non-  
490 plasmatocyte transcripts that were upregulated in haemocyte ablated larvae.

491 For all heatmaps the total number of transcripts is given in brackets, the fraction of transcripts  
492 within each k-means cluster annotated as percent values and the tissue type indicated below  
493 the heatmap. Fill color indicates scaled enrichment values.

494

### 495 **Supplementary Table 1.**

496 RNAseq data from *Hml<sup>e9-P2A</sup>>rpr* compared to *attP2>rpr* 3<sup>rd</sup> instar wandering stage larvae.  
497 Genes were classified as non-plasmatocyte (no or marginal expression in plasmatocytes),  
498 shared or plasmatocyte-enriched (>4 fold elevated in plasmatocytes).

## References

- Arefin, B., L. Kucerova, R. Krautz, H. Kranenburg, F. Parvin and U. Theopold (2015). "Apoptosis in Hemocytes Induces a Shift in Effector Mechanisms in the Drosophila Immune System and Leads to a Pro-Inflammatory State." *PLoS One* **10**(8): e0136593.
- Ayyaz, A., H. Li and H. Jasper (2015). "Haemocytes control stem cell activity in the Drosophila intestine." *Nat Cell Biol* **17**(6): 736-748.
- Binggeli, O., C. Neyen, M. Poidevin and B. Lemaitre (2014). "Prophenoloxidase activation is required for survival to microbial infections in Drosophila." *PLoS Pathog* **10**(5): e1004067.
- Braun, A., J. A. Hoffmann and M. Meister (1998). "Analysis of the Drosophila host defense in domino mutant larvae, which are devoid of hemocytes." *Proc Natl Acad Sci U S A* **95**(24): 14337-14342.
- Calo, E. and J. Wysocka (2013). "Modification of enhancer chromatin: what, how, and why?" *Mol Cell* **49**(5): 825-837.
- Cattenoz, P. B., R. Sakr, A. Pavlidaki, C. Delaporte, A. Riba, N. Molina, N. Hariharan, T. Mukherjee and A. Giangrande (2020). "Temporal specificity and heterogeneity of Drosophila immune cells." *EMBO J* **39**(12): e104486.
- Charroux, B. and J. Royet (2009). "Elimination of plasmatocytes by targeted apoptosis reveals their role in multiple aspects of the Drosophila immune response." *Proc Natl Acad Sci U S A* **106**(24): 9797-9802.
- Csordas, G., F. Grawe and M. Uhlirova (2020). "Eater cooperates with Multiplexin to drive the formation of hematopoietic compartments." *Elife* **9**.
- Defaye, A., I. Evans, M. Crozatier, W. Wood, B. Lemaitre and F. Leulier (2009). "Genetic ablation of Drosophila phagocytes reveals their contribution to both development and resistance to bacterial infection." *J Innate Immun* **1**(4): 322-334.
- Dobin, A., C. A. Davis, F. Schlesinger, J. Drenkow, C. Zaleski, S. Jha, P. Batut, M. Chaisson and T. R. Gingeras (2013). "STAR: ultrafast universal RNA-seq aligner." *Bioinformatics* **29**(1): 15-21.
- Eden, E., R. Navon, I. Steinfeld, D. Lipson and Z. Yakhini (2009). "GORilla: a tool for discovery and visualization of enriched GO terms in ranked gene lists." *BMC Bioinformatics* **10**: 48.
- Ewels, P., M. Magnusson, S. Lundin and M. Kaller (2016). "MultiQC: summarize analysis results for multiple tools and samples in a single report." *Bioinformatics* **32**(19): 3047-3048.

- Goto, A., T. Kumagai, C. Kumagai, J. Hirose, H. Narita, H. Mori, T. Kadowaki, K. Beck and Y. Kitagawa (2001). "A *Drosophila* haemocyte-specific protein, hemolectin, similar to human von Willebrand factor." Biochem J **359**(Pt 1): 99-108.
- Gunesdogan, U., H. Jackle and A. Herzig (2010). "A genetic system to assess in vivo the functions of histones and histone modifications in higher eukaryotes." EMBO Rep **11**(10): 772-776.
- Gyoergy, A., M. Roblek, A. Ratheesh, K. Valoskova, V. Belyaeva, S. Wachner, Y. Matsubayashi, B. J. Sanchez-Sanchez, B. Stramer and D. E. Siekhaus (2018). "Tools Allowing Independent Visualization and Genetic Manipulation of *Drosophila melanogaster* Macrophages and Surrounding Tissues." G3 (Bethesda) **8**(3): 845-857.
- Jung, S. H., C. J. Evans, C. Uemura and U. Banerjee (2005). "The *Drosophila* lymph gland as a developmental model of hematopoiesis." Development **132**(11): 2521-2533.
- Leader, D. P., S. A. Krause, A. Pandit, S. A. Davies and J. A. T. Dow (2018). "FlyAtlas 2: a new version of the *Drosophila melanogaster* expression atlas with RNA-Seq, miRNA-Seq and sex-specific data." Nucleic Acids Res **46**(D1): D809-D815.
- Leitao, A. B. and E. Sucena (2015). "*Drosophila* sessile hemocyte clusters are true hematopoietic tissues that regulate larval blood cell differentiation." Elife **4**.
- Liao, Y., G. K. Smyth and W. Shi (2013). "The Subread aligner: fast, accurate and scalable read mapping by seed-and-vote." Nucleic Acids Res **41**(10): e108.
- Love, M. I., W. Huber and S. Anders (2014). "Moderated estimation of fold change and dispersion for RNA-seq data with DESeq2." Genome Biol **15**(12): 550.
- Martinek, N., J. Shahab, M. Saathoff and M. Ringuette (2008). "Haemocyte-derived SPARC is required for collagen-IV-dependent stability of basal laminae in *Drosophila* embryos." J Cell Sci **121**(Pt 10): 1671-1680.
- Mase, A., J. Augsburger and K. Bruckner (2021). "Macrophages and Their Organ Locations Shape Each Other in Development and Homeostasis - A *Drosophila* Perspective." Front Cell Dev Biol **9**: 630272.
- Nehme, N. T., J. Quintin, J. H. Cho, J. Lee, M. C. Lafarge, C. Kocks and D. Ferrandon (2011). "Relative roles of the cellular and humoral responses in the *Drosophila* host defense against three gram-positive bacterial infections." PLoS One **6**(3): e14743.
- Olofsson, B. and D. T. Page (2005). "Condensation of the central nervous system in embryonic *Drosophila* is inhibited by blocking hemocyte migration or neural activity." Dev Biol **279**(1): 233-243.

- Pesch, Y. Y., D. Riedel, K. R. Patil, G. Loch and M. Behr (2016). "Chitinases and Imaginal disc growth factors organize the extracellular matrix formation at barrier tissues in insects." *Sci Rep* **6**: 18340.
- Potter, C. J., B. Tasic, E. V. Russler, L. Liang and L. Luo (2010). "The Q system: a repressible binary system for transgene expression, lineage tracing, and mosaic analysis." *Cell* **141**(3): 536-548.
- Robinson, M. D., D. J. McCarthy and G. K. Smyth (2010). "edgeR: a Bioconductor package for differential expression analysis of digital gene expression data." *Bioinformatics* **26**(1): 139-140.
- Shia, A. K., M. Glittenberg, G. Thompson, A. N. Weber, J. M. Reichhart and P. Ligoxygakis (2009). "Toll-dependent antimicrobial responses in *Drosophila* larval fat body require Spatzle secreted by haemocytes." *J Cell Sci* **122**(Pt 24): 4505-4515.
- Shin, M., N. Cha, F. Koranteng, B. Cho and J. Shim (2020). "Subpopulation of Macrophage-Like Plasmacytes Attenuates Systemic Growth via JAK/STAT in the *Drosophila* Fat Body." *Front Immunol* **11**: 63.
- Sinenko, S. A. and B. Mathey-Prevot (2004). "Increased expression of *Drosophila* tetraspanin, Tsp68C, suppresses the abnormal proliferation of ytr-deficient and Ras/Raf-activated hemocytes." *Oncogene* **23**(56): 9120-9128.
- Sinenko, S. A., J. Shim and U. Banerjee (2011). "Oxidative stress in the haematopoietic niche regulates the cellular immune response in *Drosophila*." *EMBO Rep* **13**(1): 83-89.
- Tattikota, S. G., B. Cho, Y. Liu, Y. Hu, V. Barrera, M. J. Steinbaugh, S. H. Yoon, A. Comjean, F. Li, F. Dervis, R. J. Hung, J. W. Nam, S. Ho Sui, J. Shim and N. Perrimon (2020). "A single-cell survey of *Drosophila* blood." *Elife* **9**.
- Tepass, U., L. I. Fessler, A. Aziz and V. Hartenstein (1994). "Embryonic origin of hemocytes and their relationship to cell death in *Drosophila*." *Development* **120**(7): 1829-1837.
- Woodcock, K. J., K. Kierdorf, C. A. Pouchelon, V. Vivancos, M. S. Dionne and F. Geissmann (2015). "Macrophage-derived upd3 cytokine causes impaired glucose homeostasis and reduced lifespan in *Drosophila* fed a lipid-rich diet." *Immunity* **42**(1): 133-144.
- Zerbino, D. R., P. Achuthan, W. Akanni, M. R. Amode, D. Barrell, J. Bhai, K. Billis, C. Cummins, A. Gall, C. G. Giron, L. Gil, L. Gordon, L. Haggerty, E. Haskell, T. Hourlier, O. G. Izuogu, S. H. Janacek, T. Juettemann, J. K. To, M. R. Laird, I. Lavidas, Z. Liu, J. E. Loveland, T. Maurel, W. McLaren, B. Moore, J. Mudge, D. N. Murphy, V. Newman, M. Nuhn, D. Ogeh, C. K. Ong, A. Parker, M. Patricio, H. S. Riat, H. Schuilenburg, D. Sheppard,

H. Sparrow, K. Taylor, A. Thormann, A. Vullo, B. Walts, A. Zadissa, A. Frankish, S. E. Hunt, M. Kostadima, N. Langridge, F. J. Martin, M. Muffato, E. Perry, M. Ruffier, D. M. Staines, S. J. Trevanion, B. L. Aken, F. Cunningham, A. Yates and P. Flicek (2018).

"Ensembl 2018." Nucleic Acids Res **46**(D1): D754-D761.

Zhang, T., J. Singh, T. Litfin, J. Zhan, K. Paliwal and Y. Zhou (2021). "RNACmap: A Fully Automatic Pipeline for Predicting Contact Maps of RNAs by Evolutionary Coupling Analysis." Bioinformatics.

# Figure 1

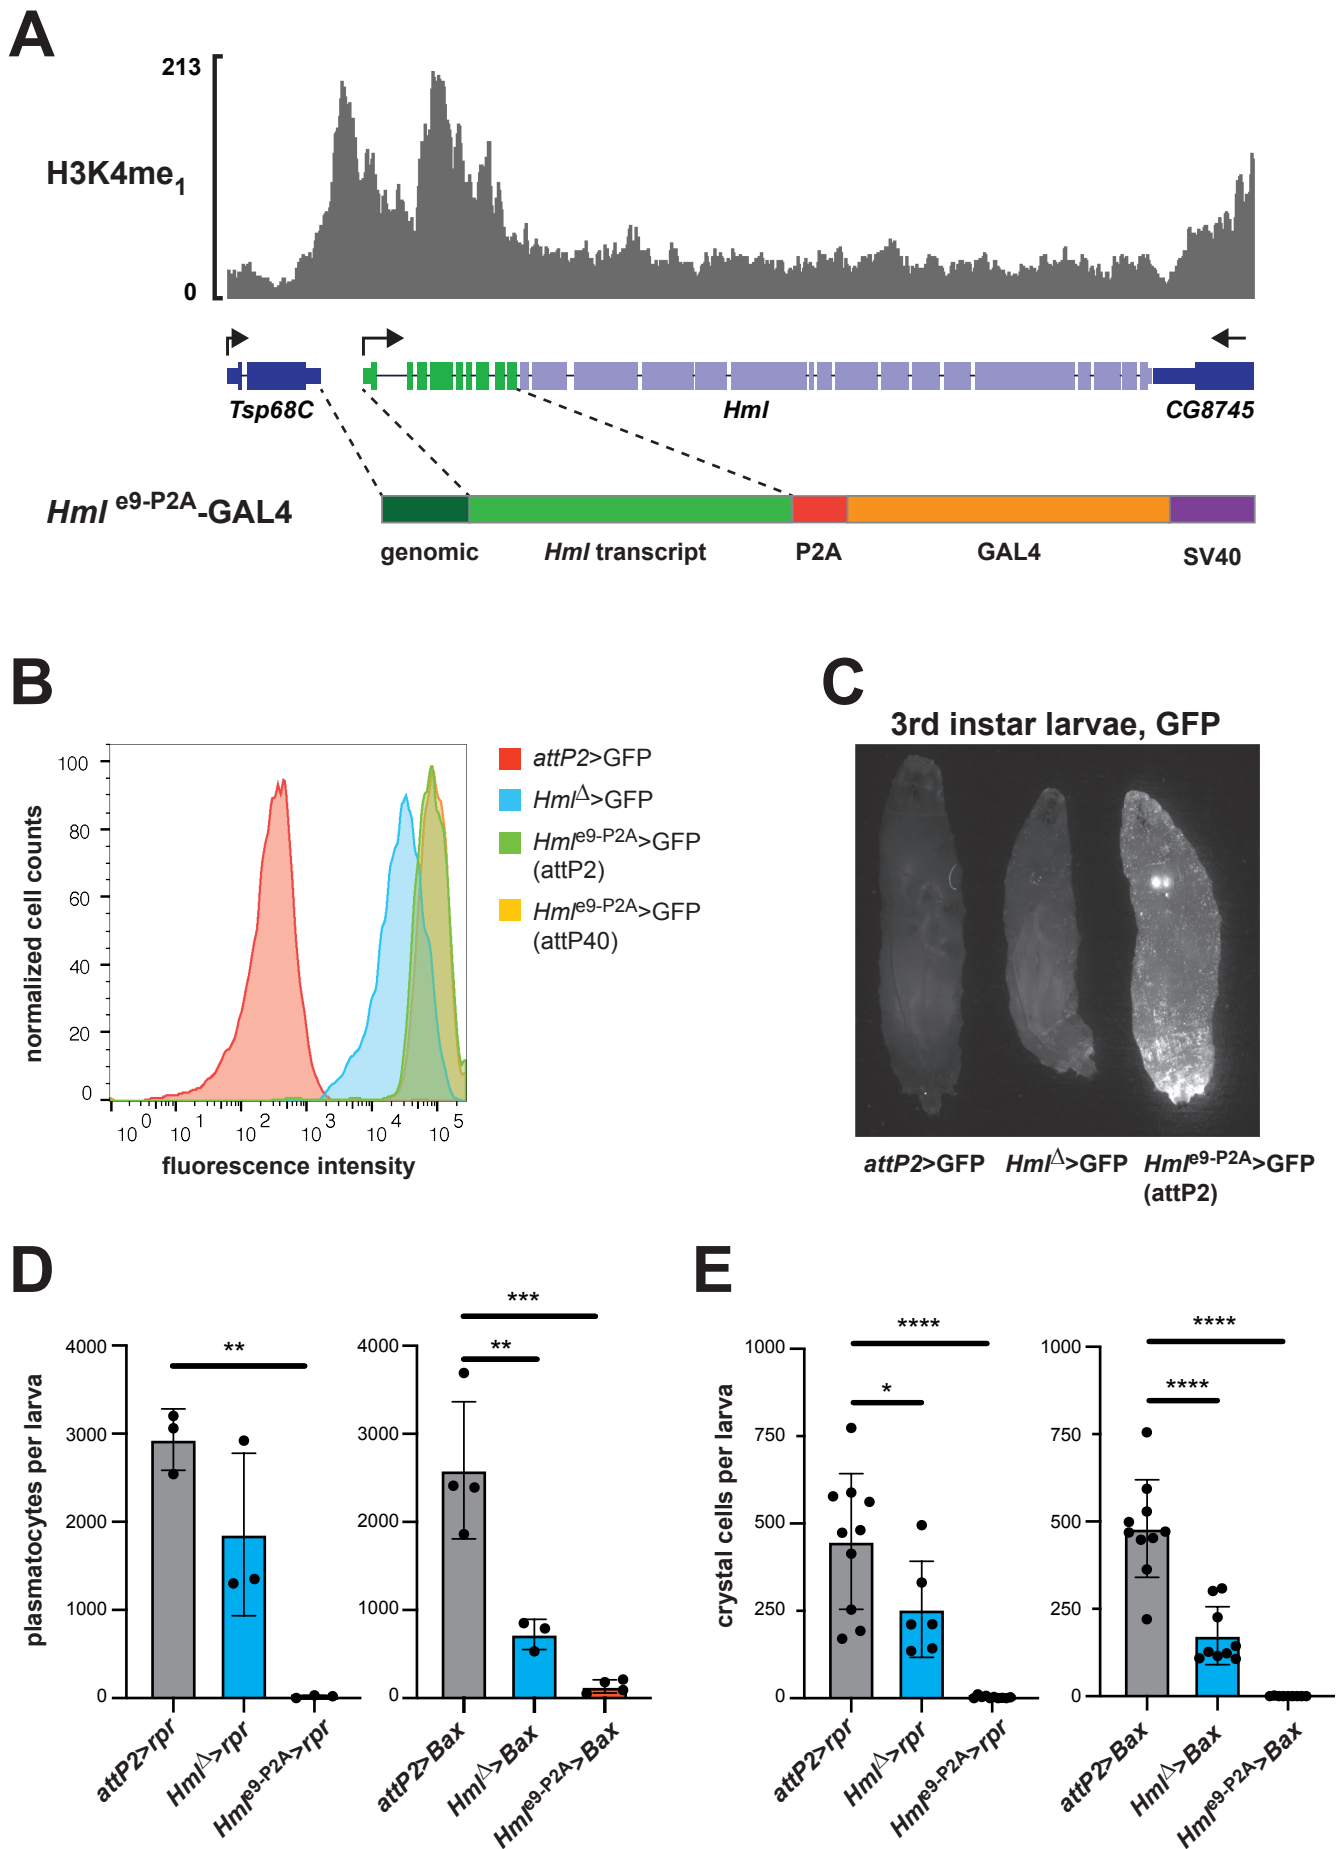

## Figure 2

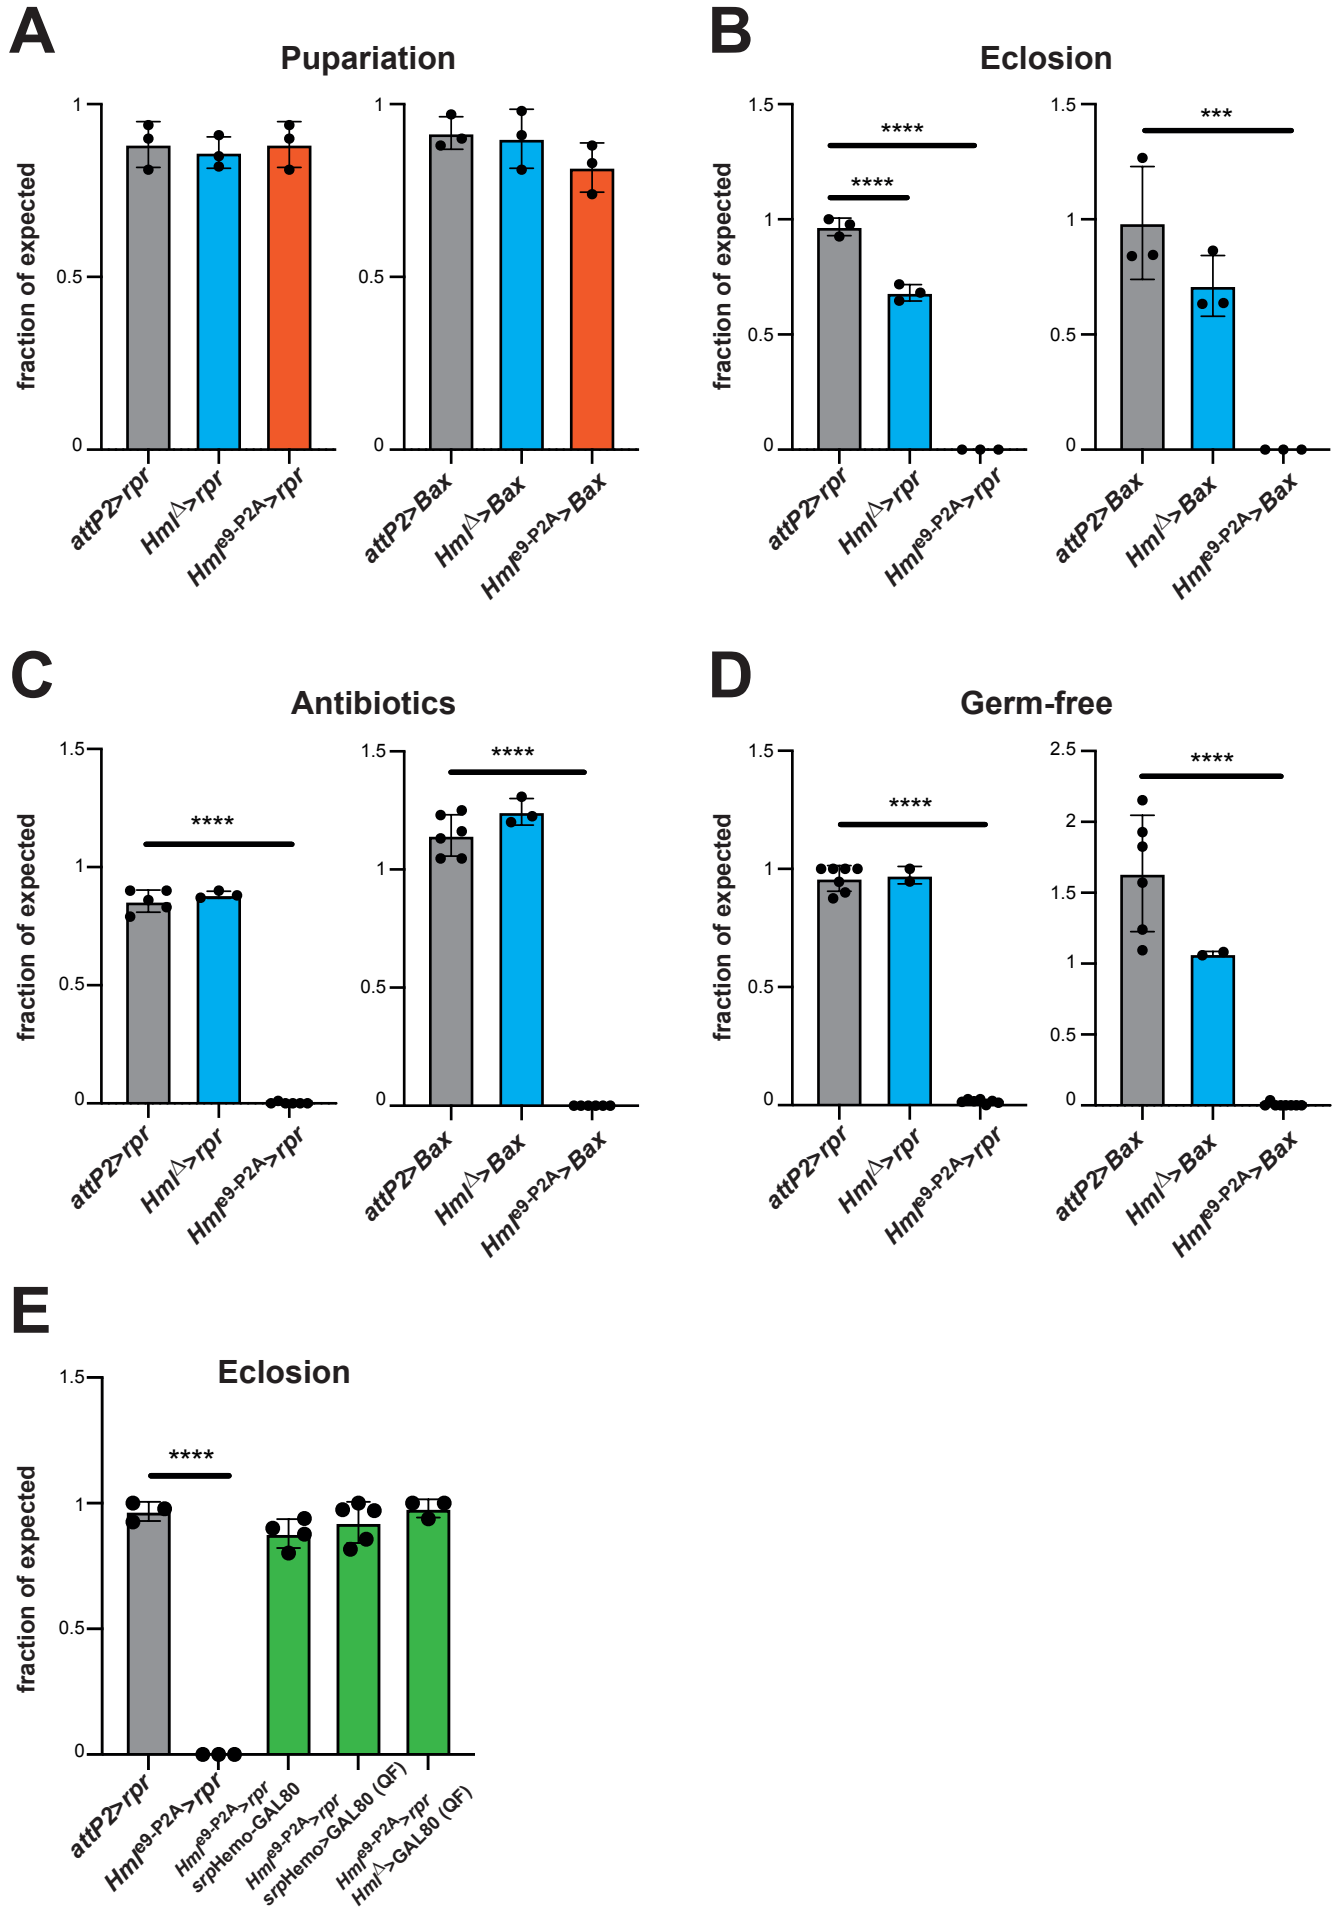



# Figure 3

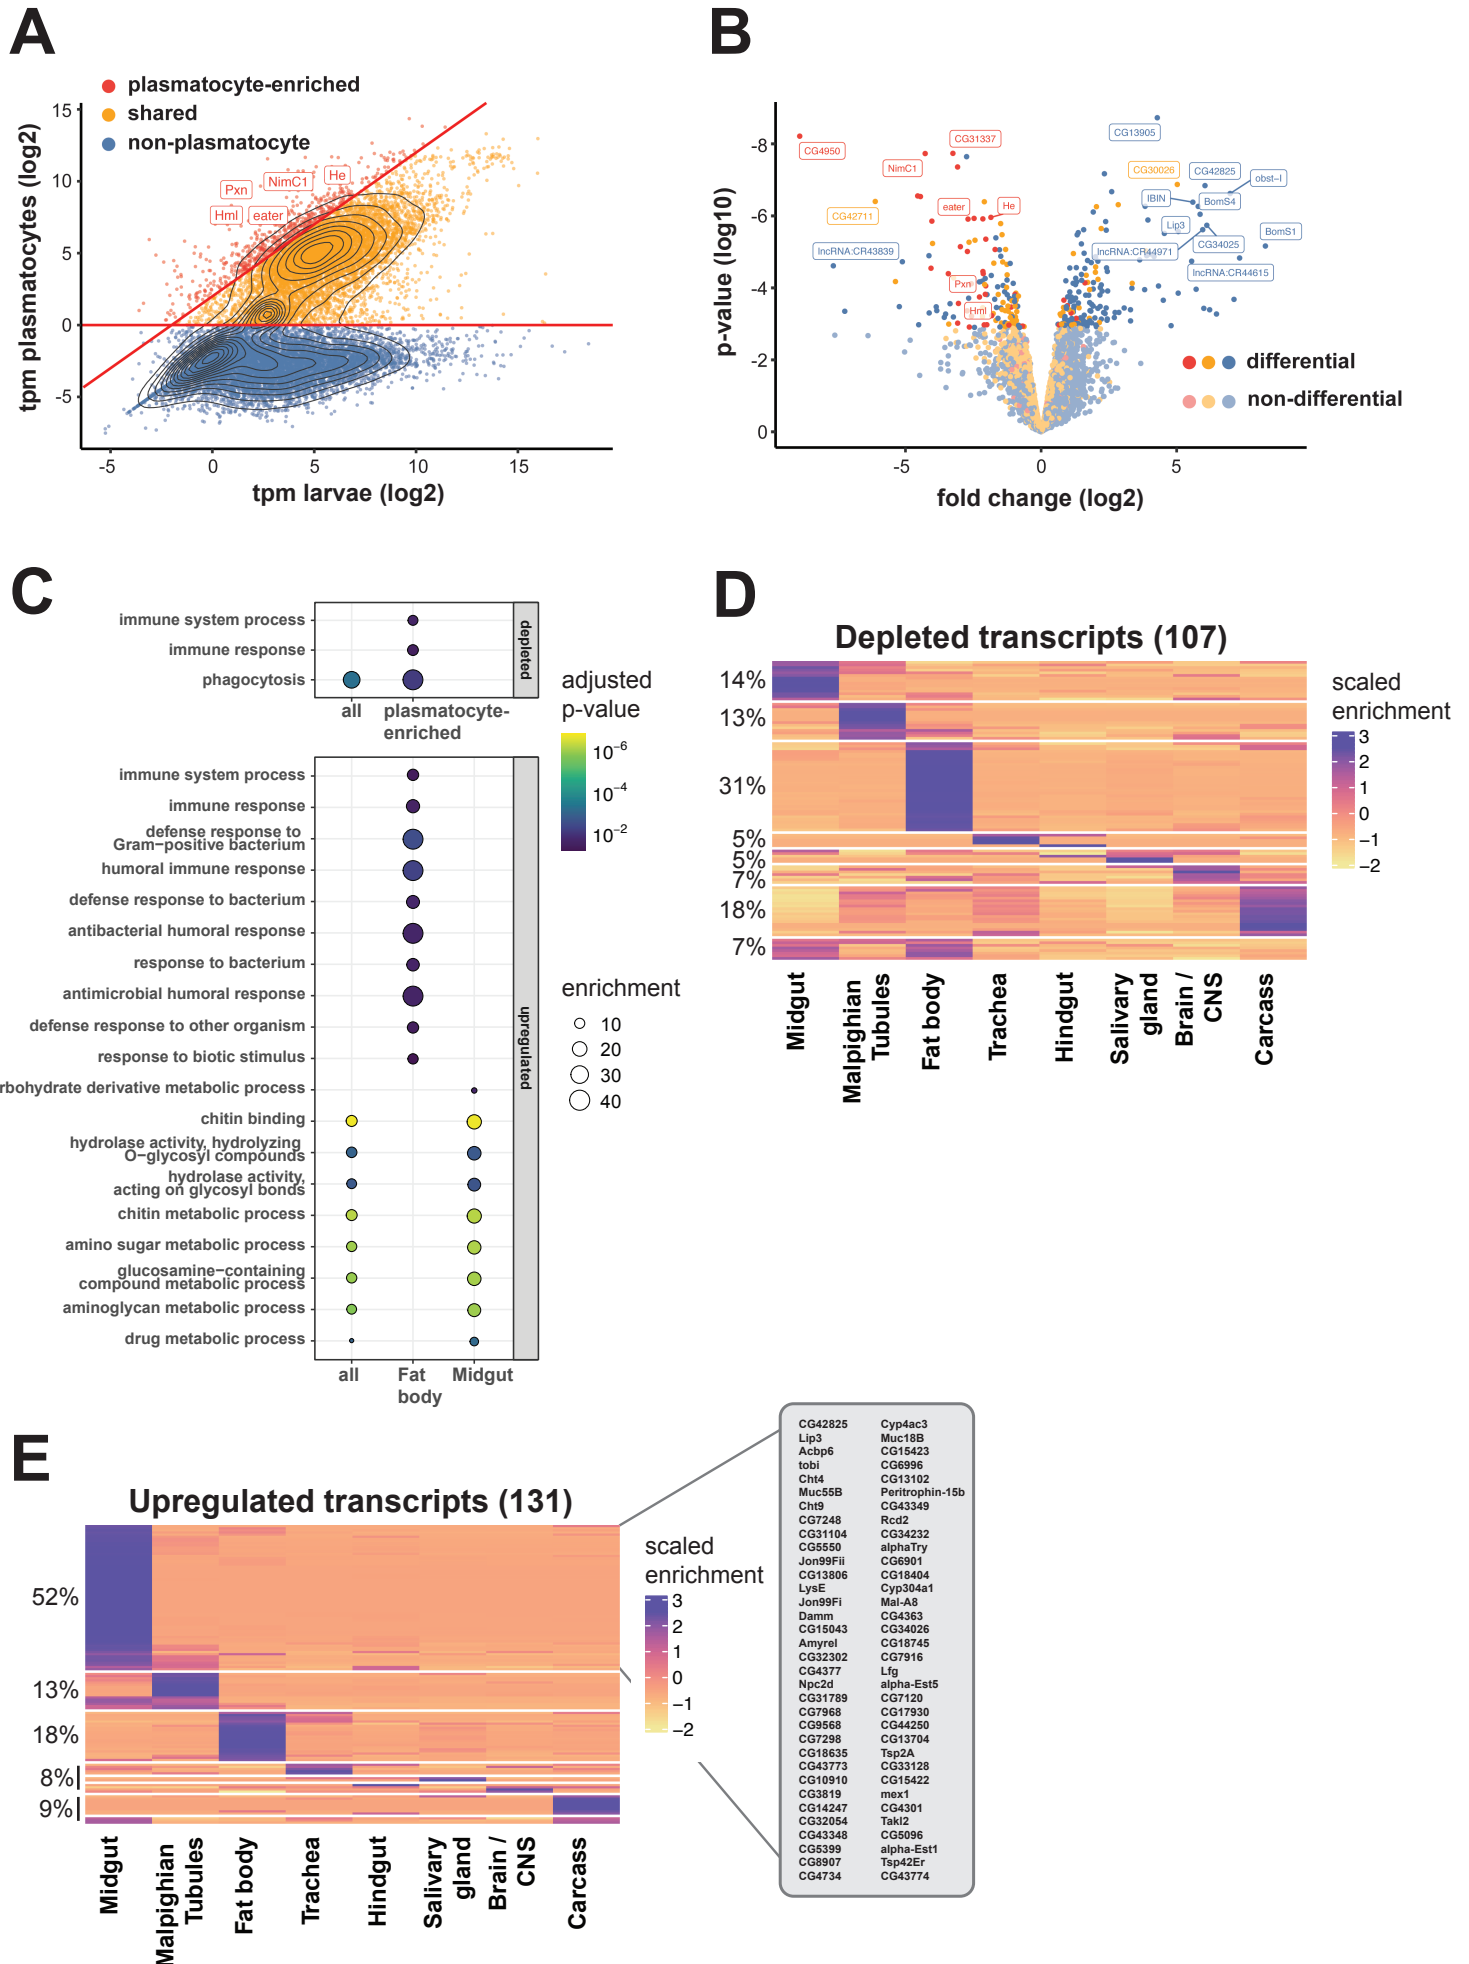

# Supplementary Figure 1

**A**

3rd instar larvae, GFP

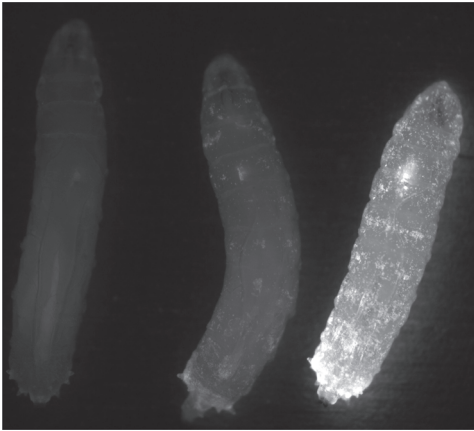

*attP2>GFP* *Hml $\Delta$ >GFP* *Hml<sup>E9-P2A</sup>>GFP*  
(attP40)

**B**

Adults, GFP

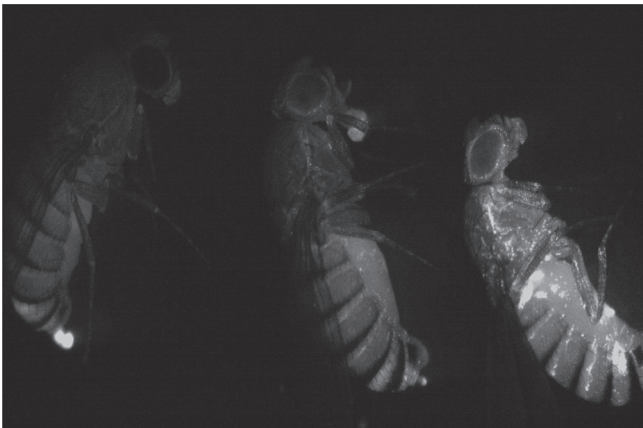

*attP2>GFP* *Hml $\Delta$ >GFP* *Hml<sup>E9-P2A</sup>>GFP*  
(attP2)

Adults, GFP

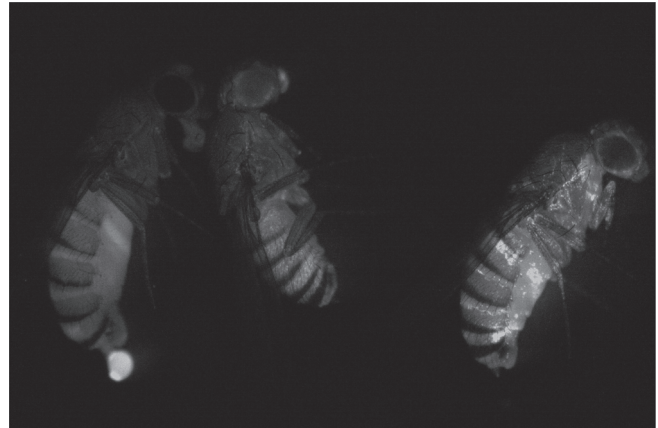

*attP2>GFP* *Hml $\Delta$ >GFP* *Hml<sup>E9-P2A</sup>>GFP*  
(attP40)

**C**

Crystal cell detection, 3rd instar larvae

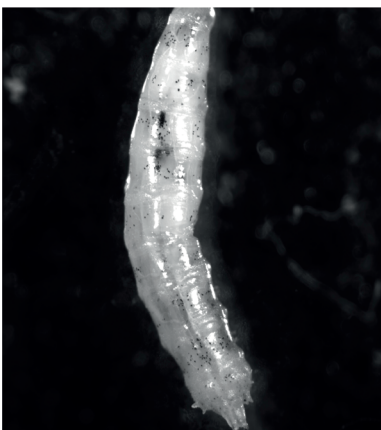

*attP2>rpr*

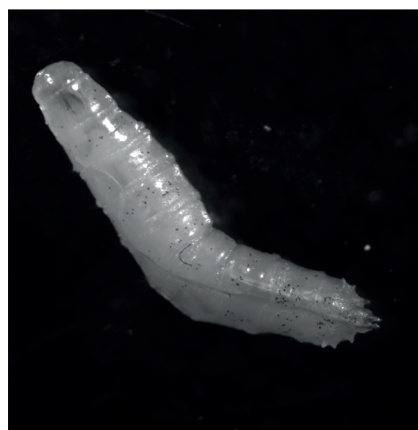

*Hml $\Delta$ >rpr*

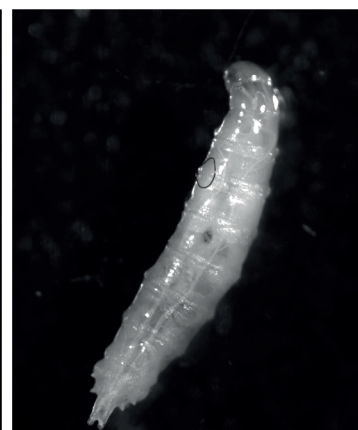

*Hml<sup>E9-P2A</sup>>rpr* (attP2)

## Supplementary Figure 2

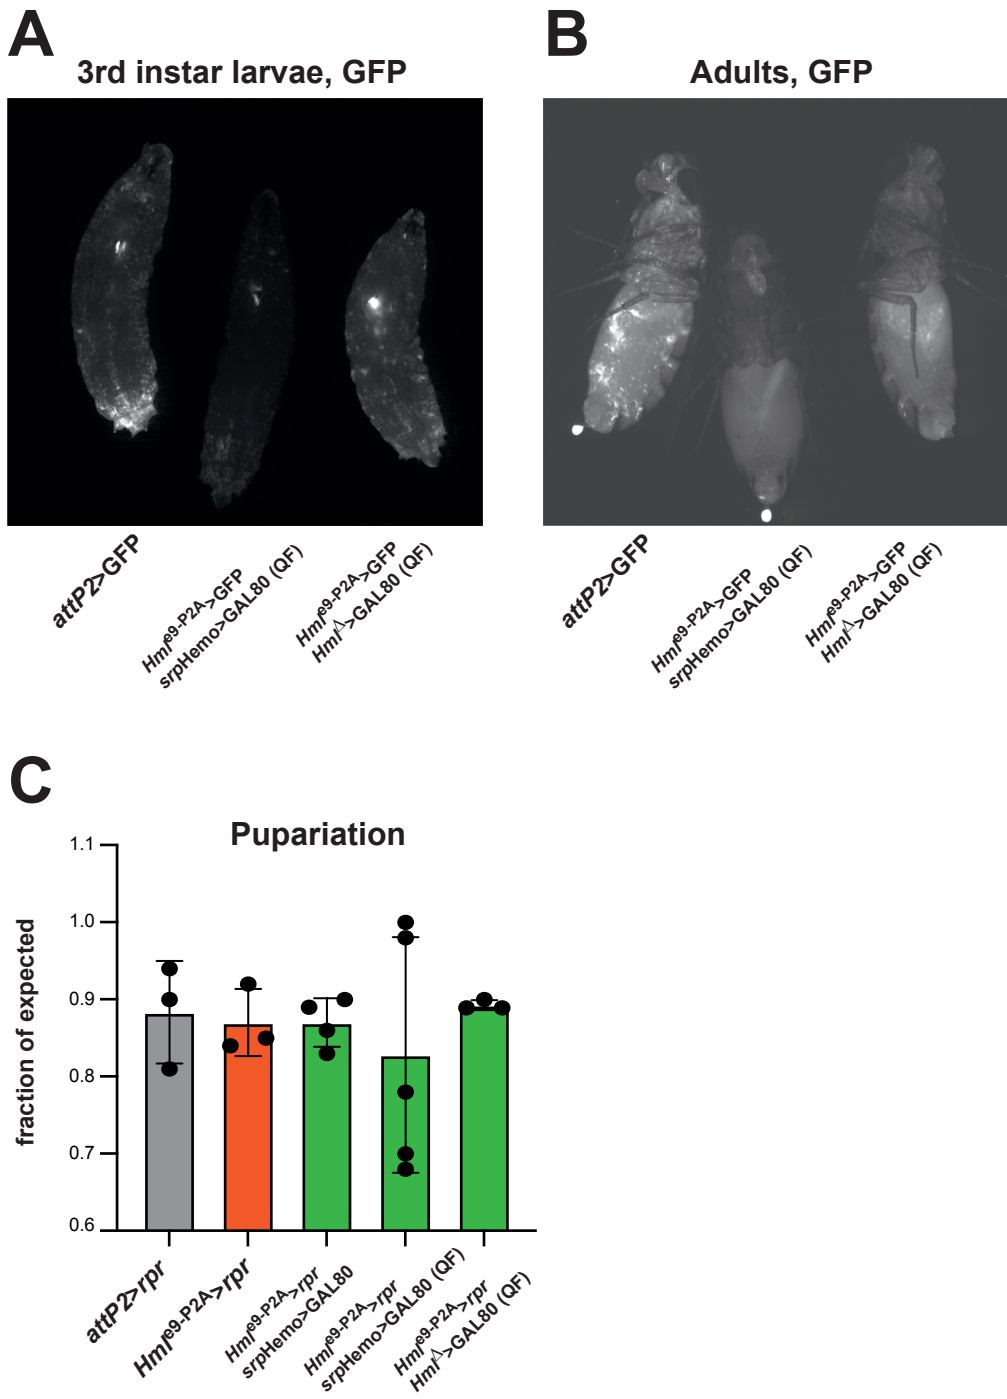

# Supplementary Figure 3

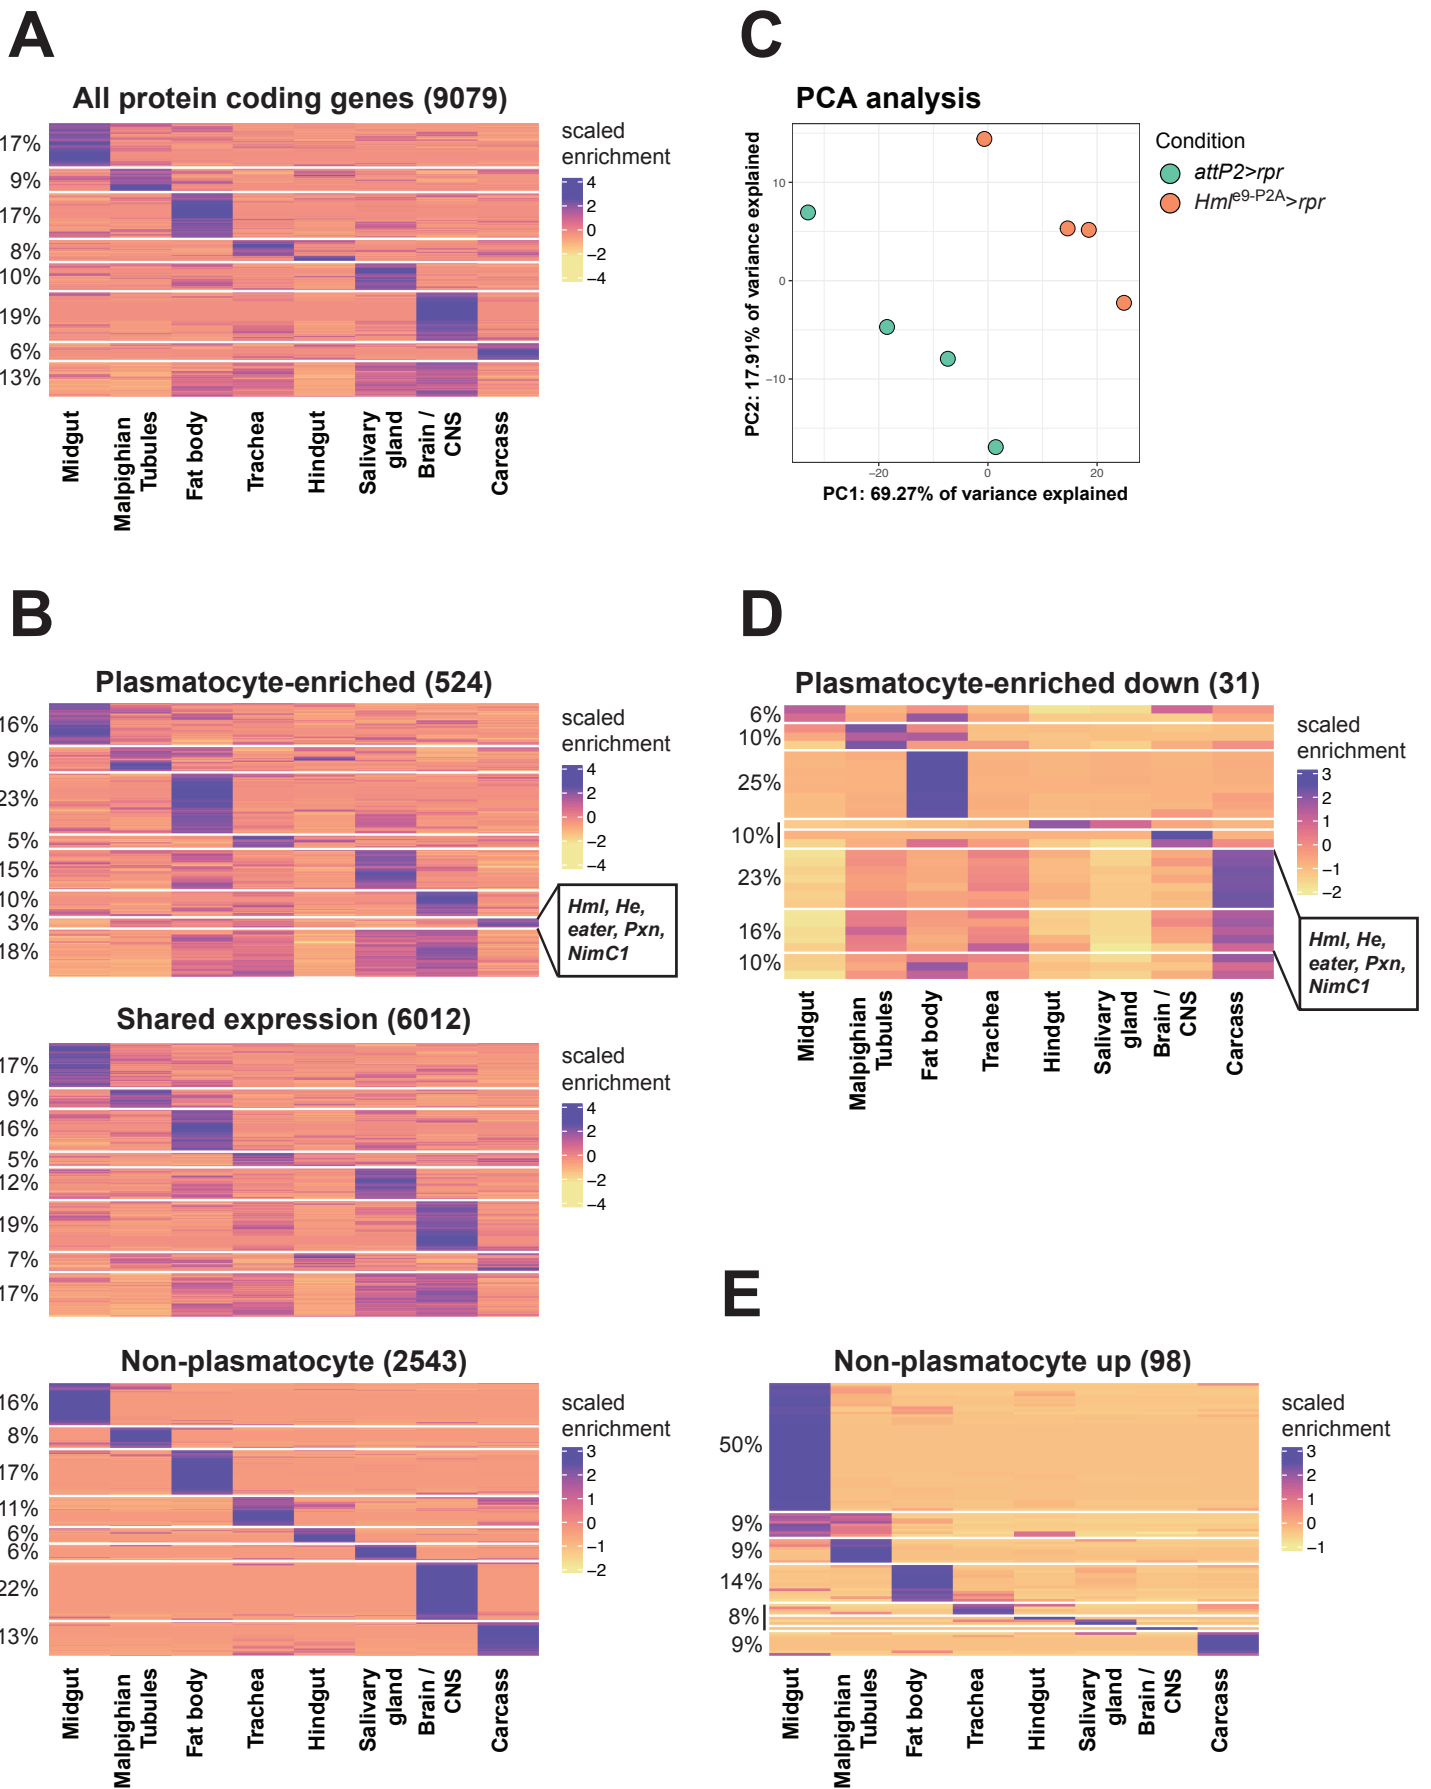

Source: http://biorxiv.org/content/10.1101/2021.10.21.465347v1.full.pdf
